# Supplementary material
Source: PubMed Central journal article supplement (PMC4704188)
Supplement: AAC.02240-15_zac001164742so1.pdf [file AAC.02240-15_zac001164742so1.pdf]

1 **Supplementary**

2

3 **Materials and Methods**

4 *Isolate collection*

5           Sixty-eight *Achromobacter* isolates were prospectively collected from CF patients  
6 between The Hospital for Sick Children, Toronto, Ontario (n = 15) and the CF Foundation  
7 *Burkholderia cepacia* Research Laboratory and Repository, Ann Arbor, Michigan (n = 53). The  
8 collection of *Achromobacter* CF isolates included five species: *Achromobacter xylosoxidans* (n =  
9 50), *Achromobacter denitrificans* (n = 3), *Achromobacter dolens* (n = 5), *Achromobacter*  
10 *insolitus* (n = 5) and *Achromobacter ruhlandii* (n = 5).

11

12 *Planktonic susceptibility testing*

13           Conventional antimicrobial susceptibility testing was performed on isolates grown  
14 planktonically by broth microdilution method following Clinical and Laboratory Standards  
15 Institute (CLSI) guidelines (1). Antibiotic panels containing various concentrations of antibiotics  
16 typically used via inhalation, that is, amikacin (0, 16, 32, 64, 128, 256, 512, 1024, 2048 and 4096  
17 µg/mL), aztreonam (0, 32, 64, 128, 256, 512, 1024 and 2048 µg/mL), colistin (0, 4, 8, 16, 32, 64,  
18 128 and 256 µg/mL), levofloxacin (0, 2, 20, 40, 80, 160, 320, 640, 1280, 2560 and 5120 µg/mL)  
19 and tobramycin (0, 10, 100, 200, 400, 800, 1600 and 3200 µg/mL) in cation-adjusted Mueller  
20 Hinton Broth (CAMHB) were prepared. Bacterial inoculum was prepared by diluting 1.5 mL of  
21 a 0.5 McFarland standard suspension into 25 mL of sterile distilled water. 10 µL of diluted  
22 bacteria was added to each well of the antibiotic panel using sterile 96-well plate inoculators  
23 (Nunc, Burlington, Ontario) to achieve an inoculum of approximately  $5 \times 10^5$  colony forming

24 units (CFU)/mL. Panels were then incubated under aerobic conditions at 37°C for 24 hours.  
25 Purity of the inoculum was checked by streaking 1uL of the positive control well onto Columbia  
26 agar plates with 5% sheep blood (Oxoid, Nepean, Canada). Minimum inhibitory concentrations  
27 (MICs) were determined by visually assessing the turbidity of wells for indication of bacterial  
28 growth after the 24-hour incubation period. MICs for each isolate were repeated in duplicates  
29 and the higher MIC was recorded. If the MIC values were greater than 2 double dilutions, this  
30 was considered a major error and the experiment was repeated.

31

### 32 *Biofilm susceptibility testing*

33 Antimicrobial susceptibility testing was performed on isolates grown as biofilms by a  
34 modified Calgary biofilm method (2). Bacterial suspension for biofilm generation was prepared  
35 by diluting 300 µL of 0.5 McFarland standard into 19.7 mL of tryptic soy broth (TSB). 150 µL  
36 of diluted bacterial suspension was then added into each well of 96-well MBEC™ Biofilm  
37 Inoculator plates (Innovotech, Edmonton, Canada). The plates were then incubated under aerobic  
38 conditions at 37°C on an orbital shaker (Labnet Orbit 1000, Woodbridge, New Jersey) to  
39 generate biofilm on the pegs of the inoculator lid. The OD<sub>650nm</sub> of the bacterial suspension in  
40 each well containing the growing biofilm were measured using the MRX Microplate Reader  
41 (Dynex Technologies, Chantilly, Virginia). Once an OD<sub>650nm</sub> of approximately 0.062 was  
42 achieved, corresponding to approximately  $5 \times 10^5$  CFU/mL, the biofilm-laden peg lid was  
43 transferred into antibiotic panels. The panel contained antibiotics amikacin, aztreonam, colistin,  
44 levofloxacin and tobramycin in CAMHB prepared at identical concentrations described above.  
45 To confirm that the proper inoculum had been achieved, serial dilutions from a peg inoculated  
46 antibiotic-free well were plated onto Columbia agar plates with 5% sheep blood. Testing was

47 repeated for isolates where the inoculum did not fall between  $10^4$  to  $10^6$  CFU/mL. Antibiotic  
48 plates with the biofilm-laden peg lid were incubated under aerobic conditions at  $37^\circ\text{C}$  for 24  
49 hours. After incubation, the peg lid was transferred into a 96-well plate with 200  $\mu\text{L}$  of sterile  
50 distilled water for 1 minute to rinse off residual antibiotics from pegs. The peg lid was then  
51 placed into a recovery plate containing 100  $\mu\text{L}$  CAMHB. The recovery plate was then incubated  
52 again under aerobic conditions at  $37^\circ\text{C}$  for 24 hours. Biofilm inhibitory concentrations (BICs) of  
53 each isolate were determined by visually assessing the turbidity of each well. BICs for each  
54 isolate were repeated in duplicates and the higher BIC was recorded.

55

#### 56 *Biofilm slide-chamber model and confocal microscopy*

57 Five *A. xylosoxidans* CF isolates with intermediate BICs, defined as less than or equal to  
58 800  $\mu\text{g}/\text{mL}$  tobramycin, and another 5 isolates from the same species but with high BICs, defined  
59 as greater than 800  $\mu\text{g}/\text{mL}$  tobramycin, were selected for further study in the biofilm slide-  
60 chamber model. A single bacterial colony of each isolate was inoculated from Columbia agar  
61 plates with 5% sheep blood into 4 mL of lysogeny broth (LB). Inoculated cultures were grown  
62 under aerobic conditions at  $37^\circ\text{C}$  for approximately 15 hours with shaking at 250 RPM. Cultures  
63 were then diluted 1:1000 and grown to an  $\text{OD}_{600\text{nm}}$  of 0.6 before being diluted again to an  
64  $\text{OD}_{600\text{nm}}$  of 0.1. 250  $\mu\text{L}$  of 0.1  $\text{OD}_{600\text{nm}}$  cultures was then seeded into each chamber of an eight-  
65 chambered coverslip slide (LabTek II Chamber Slide on 1.5 Borosilicate, VMR, Mississauga).  
66 The chamber slide was then incubated under aerobic conditions at  $37^\circ\text{C}$  for 24 hours to allow  
67 static biofilm formation. After incubation, media was removed and replaced with fresh LB for an  
68 additional 24 hours at  $37^\circ\text{C}$ . Biofilms were then treated with various concentrations of  
69 tobramycin (0, 8, 400, 1000 and 2000  $\mu\text{g}/\text{mL}$ ) with LB in a total volume of 250  $\mu\text{L}$  for 24 hours.

70 Treated biofilms were stained for 45 minutes using 200  $\mu$ L of staining reagent from the  
71 FilmTracer® LIVE/DEAD Biofilm Viability Kit (Life Technologies, Burlington, Ontario).  
72 Staining reagent was then removed and replaced with 250  $\mu$ L of fresh LB. Confocal images were  
73 acquired using a Quorum WaveFX spinning disk confocal system (Quorum Technologies Inc.,  
74 Guelph, Canada). All images were acquired using a 25X water objective (total magnification of  
75 250X) on a Zeiss AxioVert 200M Microscope. Spectral borealis lasers (Green: 491nm, Red:  
76 561nm) were used for excitation. Emission filter sets of 515/40 and 624/40 were used to  
77 visualize the SYTO9 and propidium iodide stains respectively. Images in the Z-Stack were  
78 obtained at a distance of 0.8 $\mu$ m to obtain the depth of the biofilm. Volocity software  
79 (PerkinElmer, Guelph) was used for acquisition and analysis of images. For each strain tested,  
80 the percent dead was calculated as the (mean florescence of the red channel/ (mean fluorescence  
81 of green channel +mean fluorescence of red channel))\*100% for three views of a chamber. This  
82 was done for three independent chambers for each strain in a group. The mean % dead for the  
83 intermediate resistant group (5 strains) and the high resistant group (5 strains) was then plotted  
84 and analyzed for statistical significance.

85

86

87 **References**

- 88 1. **Clinical and Laboratories Standards Institute.** 2012. Performance standards for  
89 303 antimicrobial susceptibility testing: 22nd informational supplement M100-S22. CLSI,  
90 Wayne, PA.
- 91 2. **Ratjen A, Yau Y, Wettlaufer J, Matukas L, Zlosnik JE, Speert DP, LiPuma JJ,**  
92 **Tullis E, Waters V.** 2015. In Vitro Efficacy of High-Dose Tobramycin against *Burkholderia*  
93 *cepacia* Complex and *Stenotrophomonas maltophilia* Isolates from Cystic Fibrosis Patients.  
94 Antimicrob Agents Chemother **59(1):**711-3.

95

96 **FIGURE LEGENDS**

97 **SUPPLEMENTAL FIG 1.** Distribution of MICs (■) and BICs (■) for amikacin (A), aztreonam  
98 (B), colistin (C), levofloxacin (D) and tobramycin (E) measured by planktonic and biofilm  
99 susceptibility testing for *Achromobacter* CF isolates.

100

101

102

103

104

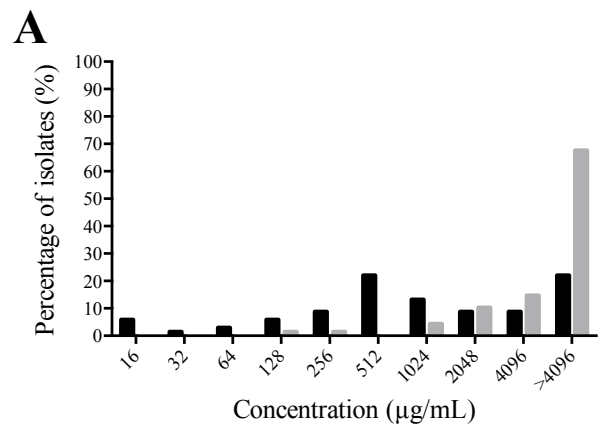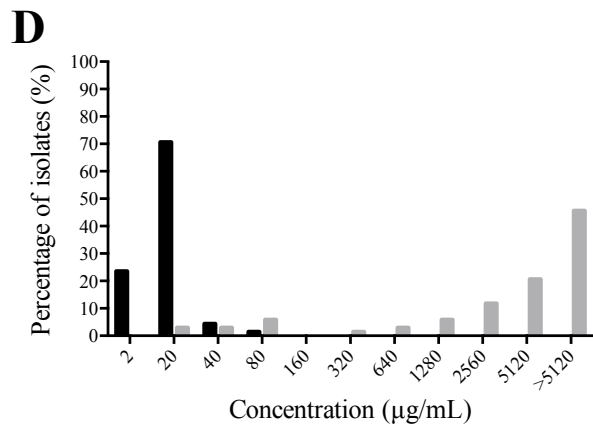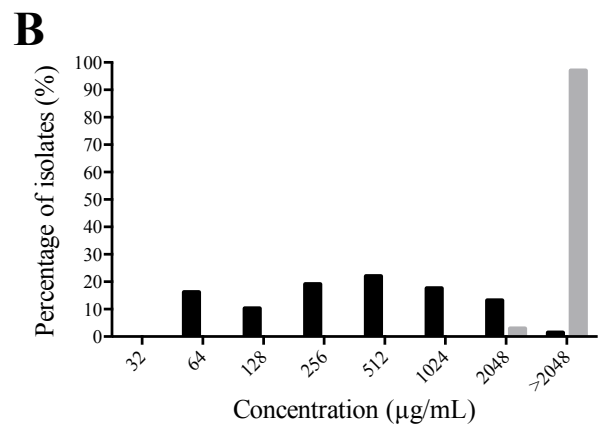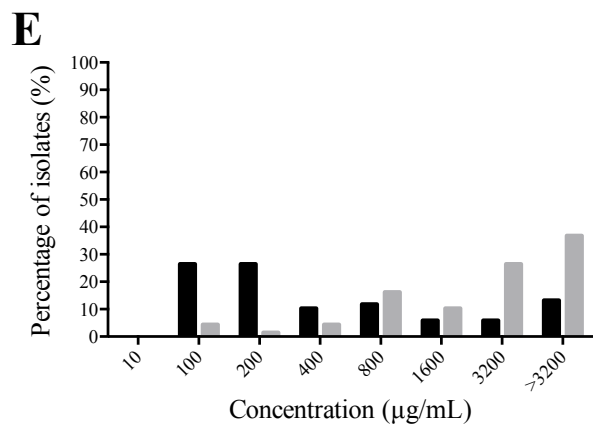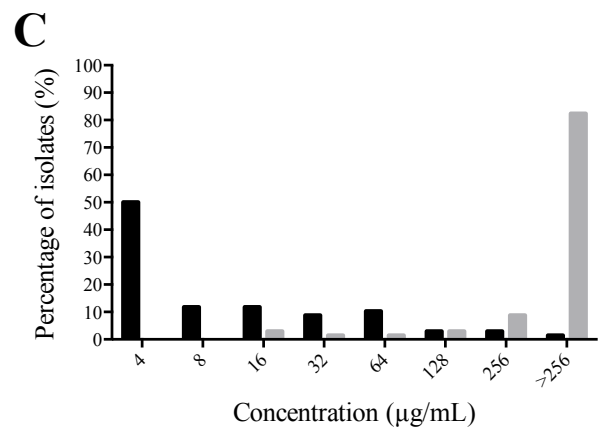

**SUPPLEMENTAL FIG 1.** Distribution of MICs (■) and BICs (■) for amikacin (A), aztreonam (B), colistin (C), levofloxacin (D) and tobramycin (E) measured by planktonic and biofilm susceptibility testing for *Achromobacter* CF isolates.
